# Supplementary material for: Depressive Symptoms and Their Associated Factors in Vocational–Technical School Students during the COVID-19 Pandemic
Source: MDPI journal article supplement (doi:10.3390/ijerph19063735), 2022-03-21
Supplement: s1 [file s1]

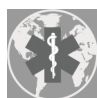

**Table S1.** Poisson regression analysis of depressive symptoms and independent variables (n=343).

| Variables                                          | Prevalence of Depressive Symptoms |                  |          |                      |          |
|----------------------------------------------------|-----------------------------------|------------------|----------|----------------------|----------|
|                                                    | (%)                               | PR (95% CI)      | <i>p</i> | Adjusted PR (95% CI) | <i>p</i> |
| Sociodemographic characteristics                   |                                   |                  |          |                      |          |
| Sex                                                |                                   |                  |          |                      |          |
| Male                                               | 31.6                              | 1                | <0.001   | 1                    | <0.001   |
| Female                                             | 52.9                              | 1.68 (1.28–2.19) |          | 1.72 (1.31–2.27)     |          |
| Age (years)                                        |                                   |                  |          |                      |          |
| 14–15                                              | 39.4                              | 1                | 0.461    | 1                    | 0.475    |
| 16                                                 | 47.4                              | 1.20 (0.89–1.63) |          | 1.19 (0.88–1.48)     |          |
| 17–18                                              | 42.3                              | 1.08 (0.78–1.49) |          | 1.08 (0.79–1.49)     |          |
| Color/ ethnicity                                   |                                   |                  |          |                      |          |
| White                                              | 42.9                              | 1                | 0.980    | 1                    | 0.901    |
| Brown                                              | 43.6                              | 1.02 (0.78–1.32) |          | 1.06 (0.82–1.37)     |          |
| Other                                              | 23.5                              | 1.04 (0.71–1.52) |          | 1.02 (0.70–1.48)     |          |
| Area                                               |                                   |                  |          |                      |          |
| Rural                                              | 43.3                              | 1                | 0.960    | 1                    | 0.306    |
| Metropolitan                                       | 43.6                              | 1.01 (0.78–1.30) |          | 0.87 (0.67–1.13)     |          |
| Grade/ Year                                        |                                   |                  |          |                      |          |
| 11 <sup>th</sup> grade/ 3 <sup>rd</sup> year       | 18.1                              | 1                | 0.194    | 1                    | 0.003    |
| 10 <sup>th</sup> grade/ 2 <sup>nd</sup> year       | 36.2                              | 1.39 (0.97–1.99) |          | 1.80 (1.18–2.76)     |          |
| 9 <sup>th</sup> grade/ 1 <sup>st</sup> year        | 45.6                              | 1.33 (0.93–1.89) |          | 2.12 (1.37–3.26)     |          |
| Computer                                           |                                   |                  |          |                      |          |
| Yes                                                | 41.7                              | 1                | 0.218    | 1                    | 0.127    |
| No                                                 | 49.4                              | 1.18 (0.91–1.55) |          | 1.16 (0.89–1.52)     |          |
| Employment                                         |                                   |                  |          |                      |          |
| No                                                 | 42.7                              | 1                | 0.616    | 1                    | 0.193    |
| Yes                                                | 45.8                              | 1.07 (0.82–1.41) |          | 1.20 (0.91–1.57)     |          |
| Household                                          |                                   |                  |          |                      |          |
| Lives with the father and the mother               | 37.6                              | 1                | 0.024    | 1                    | 0.109    |
| Lives with only the mother or only with the father | 52.8                              | 1.40 (1.10–1.80) |          | 1.29 (1.01–1.66)     |          |
| Does not live with the parents                     | 40.7                              | 1.09 (0.66–1.77) |          | 1.01 (0.64–1.61)     |          |
| Pandemic-related situations                        |                                   |                  |          |                      |          |
| COVID-19 diagnosis                                 |                                   |                  |          |                      |          |
| No                                                 | 44.0                              | 1                | 0.592    | 1                    | 0.720    |
| Yes                                                | 39.5                              | 0.90 (0.61–1.33) |          | 0.93 (0.64–1.36)     |          |
| Social isolation                                   |                                   |                  |          |                      |          |
| Not at all isolated                                | 34.3                              | 1                | <0.001   | 1                    | 0.034    |
| Slightly isolated                                  | 27.9                              | 0.82 (0.45–1.48) |          | 0.79 (0.38–1.63)     |          |
| Moderately isolated                                | 43.0                              | 1.25 (0.76–2.06) |          | 1.17 (0.63–2.19)     |          |
| Very isolated                                      | 50.7                              | 1.48 (0.89–2.47) |          | 1.40 (0.73–2.72)     |          |
| Extremely isolated                                 | 75.9                              | 2.21 (1.34–3.66) |          | 2.04 (1.00–4.14)     |          |
| Concerned with the health of family/ friends       |                                   |                  |          |                      |          |
| Not at all concerned/Slightly                      | 44.2                              | 1                | 0.324    | 1                    | 0.542    |
| Moderately concerned                               | 35.2                              | 0.80 (0.51–1.24) |          | 0.75 (0.43–1.34)     |          |
| Very concerned/Extremely                           | 45.9                              | 1.04 (0.74–1.45) |          | 0.95 (0.60–1.50)     |          |
| Concerned with remote learning                     |                                   |                  |          |                      |          |
| Not at all concerned/Slightly                      | 45.8                              | 1                | 0.246    | 1                    | 0.521    |
| Moderately concerned                               | 31.3                              | 0.68 (0.37–1.25) |          | 0.67 (0.31–1.46)     |          |
| Very concerned/Extremely                           | 45.4                              | 0.99 (0.63–1.56) |          | 0.89 (0.48–1.67)     |          |
| Concerned with the impact of COVID-19 on finances  |                                   |                  |          |                      |          |
| Not at all concerned/Slightly                      | 39.5                              | 1                | 0.094    | 1                    | 0.382    |
| Moderately concerned                               | 36.3                              | 0.92 (0.63–1.34) |          | 0.90 (0.55–1.45)     |          |
| Very concerned/Extremely                           | 49.4                              | 1.25 (0.92–1.69) |          | 1.18 (0.78–1.78)     |          |
| Social distancing measures                         |                                   |                  |          |                      |          |
| I followed all social distancing measures          | 53.2                              | 1                | 0.165    | 1                    | 0.235    |

|                                                                     |      |                  |        |                  |        |
|---------------------------------------------------------------------|------|------------------|--------|------------------|--------|
| I left home to perform essential activities, including work         | 46.2 | 0.87 (0.64–1.89) |        | 0.85 (0.62–1.16) |        |
| I left home only to perform essential activities, unrelated to work | 37.6 | 0.71 (0.52–0.96) |        | 0.73 (0.54–0.99) |        |
| I did not follow any social distancing measure                      | 44.4 | 0.84 (0.47–1.47) |        | 0.93 (0.51–1.70) |        |
| Social distancing period                                            |      |                  |        |                  |        |
| Fewer than 30 days                                                  | 42.4 | 1                | 0.733  | 1                | 0.951  |
| From 30 to 60 days                                                  | 40.4 | 0.95 (0.65–1.40) |        | 0.94 (0.64–1.38) |        |
| More than 60 days                                                   | 45.3 | 1.07 (0.78–1.50) |        | 0.97 (0.62–1.52) |        |
| Eating habits                                                       |      |                  |        |                  |        |
| Feeling hungry in the last 7 days                                   |      |                  |        |                  |        |
| Never                                                               | 37.9 | 1                | <0.001 | 1                | <0.001 |
| Rarely                                                              | 67.5 | 1.78 (1.37–2.31) |        | 1.82 (1.43–2.32) |        |
| Sometimes/ often/ always                                            | 77.8 | 2.05 (1.54–2.74) |        | 1.78 (1.33–2.39) |        |
| Eating fruits in the last 7 days                                    |      |                  |        |                  |        |
| Regular consumption <sup>a</sup>                                    | 37.1 | 1                | 0.039  | 1                | 0.067  |
| Irregular consumption                                               | 48.4 | 1.31 (1.01–1.68) |        | 1.26 (0.98–1.62) |        |
| Eating legumes/ vegetables in the last 7 days                       |      |                  |        |                  |        |
| Regular consumption <sup>a</sup>                                    | 42.0 | 1                | 0.485  | 1                | 0.431  |
| Irregular consumption                                               | 45.8 | 1.09 (0.85–1.39) |        | 1.10 (0.87–1.40) |        |
| Drinking soda in the last 7 days                                    |      |                  |        |                  |        |
| Irregular consumption                                               | 44.4 | 1                | 0.564  | 1                | 0.646  |
| Regular consumption <sup>a</sup>                                    | 41.0 | 0.92 (0.70–1.21) |        | 1.07 (0.81–1.40) |        |
| Psychoactive substance use                                          |      |                  |        |                  |        |
| Tobacco smoking                                                     |      |                  |        |                  |        |
| No                                                                  | 42.4 | 1                | 0.256  | 1                | 0.440  |
| Yes                                                                 | 51.2 | 1.21 (0.87–1.68) |        | 1.14 (0.82–1.59) |        |
| Smoked in the last 30 days                                          |      |                  |        |                  |        |
| Never                                                               | 43.1 | 1                | 0.405  | 1                | 0.339  |
| 1 or more days                                                      | 55.6 | 1.29 (0.71–2.34) |        | 1.32 (0.75–2.38) |        |
| Alcohol drinking                                                    |      |                  |        |                  |        |
| No                                                                  | 40.4 | 1                | 0.198  | 1                | 0.310  |
| Yes                                                                 | 47.3 | 1.17 (0.92–1.49) |        | 1.14 (0.89–1.46) |        |
| Drank in the last 30 days                                           |      |                  |        |                  |        |
| Never                                                               | 40.4 | 1                | 0.006  | 1                | 0.121  |
| 1-2 days                                                            | 48.6 | 1.21 (0.84–1.73) |        | 1.12 (0.79–1.58) |        |
| 3-9 days                                                            | 69.6 | 1.72 (1.27–2.34) |        | 1.45 (1.06–1.99) |        |
| 10 or more days                                                     | 50.0 | 1.24 (0.61–2.51) |        | 1.39 (0.76–2.53) |        |
| Being drunk                                                         |      |                  |        |                  |        |
| Never                                                               | 41.4 | 1                | 0.072  | 1                | 0.262  |
| 1-2 days                                                            | 45.9 | 1.11 (0.76–1.62) |        | 0.97 (0.63–1.50) |        |
| 3 or more days                                                      | 60.7 | 1.47 (1.05–2.04) |        | 1.33 (0.90–1.98) |        |
| Prior drug use (marijuana, cocaine, crack)                          |      |                  |        |                  |        |
| No                                                                  | 42.6 | 1                | 0.036  | 1                | 0.081  |
| Yes                                                                 | 66.7 | 1.57 (1.03–2.38) |        | 1.44 (0.96–2.17) |        |
| Drug use in the last 30 days                                        |      |                  |        |                  |        |
| Never                                                               | 43.2 | 1                | 0.294  |                  | 0.623  |
| 1 or more days                                                      | 66.7 | 1.54 (0.69–3.46) |        | 1.28 (0.48–3.40) |        |
| Sexual behavior                                                     |      |                  |        |                  |        |
| Prior sexual intercourse                                            |      |                  |        |                  |        |
| No                                                                  | 40.6 | 1                | 0.057  | 1                | 0.068  |
| Yes                                                                 | 51.7 | 1.28 (0.99–1.64) |        | 1.28 (0.98–1.69) |        |
| Age at first sexual intercourse                                     |      |                  |        |                  |        |
| ≥15 years                                                           | 52.6 | 1                | 0.328  | 1                | 0.413  |
| 13 - 14 years                                                       | 44.0 | 0.84 (0.50–1.39) |        | 0.88 (0.52–1.52) |        |
| ≤12 years                                                           | 71.4 | 1.36 (0.80–2.30) |        | 1.38 (0.75–2.53) |        |
| Number of sexual partners in lifetime                               |      |                  |        |                  |        |
| 1                                                                   | 57.5 | 1                | 0.441  | 1                | 0.389  |
| 2 to 3                                                              | 41.9 | 0.73 (0.45–1.19) |        | 0.74 (0.45–1.19) |        |
| 4 or more                                                           | 55.6 | 0.97 (0.59–1.58) |        | 1.08 (0.64–1.85) |        |
| Physical activity level                                             |      |                  |        |                  |        |

|              |      |                  |        |  |                  |        |
|--------------|------|------------------|--------|--|------------------|--------|
| High         | 28.3 | 1                |        |  | 1                |        |
| Moderate     | 42.8 | 1.51 (0.97–2.34) | 0.014  |  | 1.41 (0.92–2.16) | 0.047  |
| Low          | 52.7 | 1.86 (1.20–2.89) |        |  | 1.68 (1.09–2.59) |        |
| WHOQOL-bref  |      |                  |        |  |                  |        |
| High QoL     | 13.2 | 1                |        |  | 1                |        |
| Moderate QoL | 40.0 | 3.04 (1.80–5.12) | <0.001 |  | 2.87 (1.68–4.89) | <0.001 |
| Low QoL      | 77.2 | 5.87 (3.62–9.50) |        |  | 5.66 (3.48–9.19) |        |

Acronyms: CI, confidence interval; PR, prevalence ratio; WHOQOL-bref, World Health Organization; QoL, Quality of Life.

*p* values in bold indicate significant differences ( $p < 0.05$ ).
